# Supplementary material for: Annual forest and evergreen forest cover maps in the Brazilian Amazon in terms of FAO's forest definition
Source: Copernicus journal article supplement (doi:10.5194/essd-2022-379), 2023-01-02
Supplement: Supplementary file [file essd-2022-379-AC2-supplement.pdf]

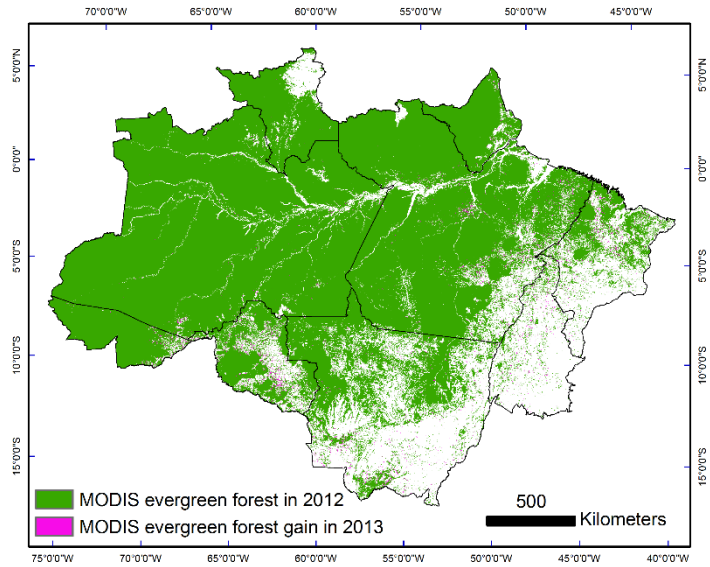

Figure R2\_1. MODIS evergreen forest cover gain in 2013.

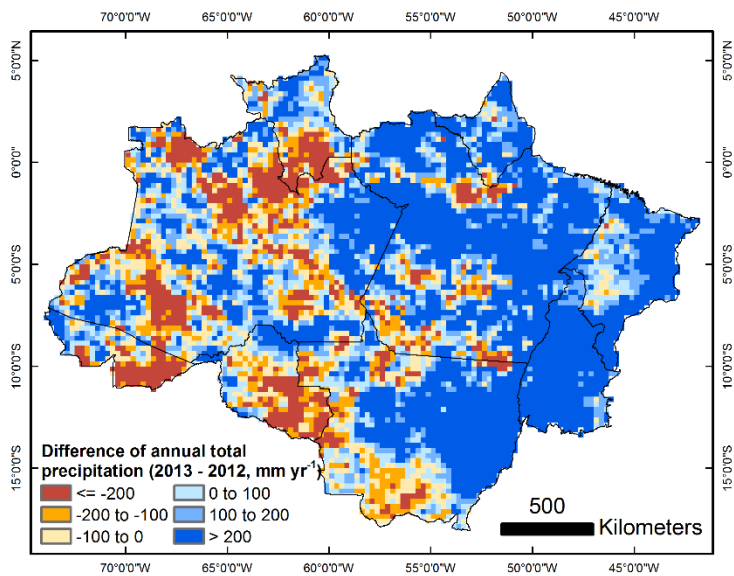

Figure R2\_2. Difference of annual total precipitation between 2012 and 2013. The precipitation data is from the Tropical Rainfall Measuring Mission data product.
