# Supplementary material for: Annual forest and evergreen forest cover maps in the Brazilian Amazon in terms of FAO's forest definition
Source: Copernicus journal article supplement (doi:10.5194/essd-2022-379), 2023-01-02
Supplement: Supplementary file [file essd-2022-379-AC4-supplement.pdf]

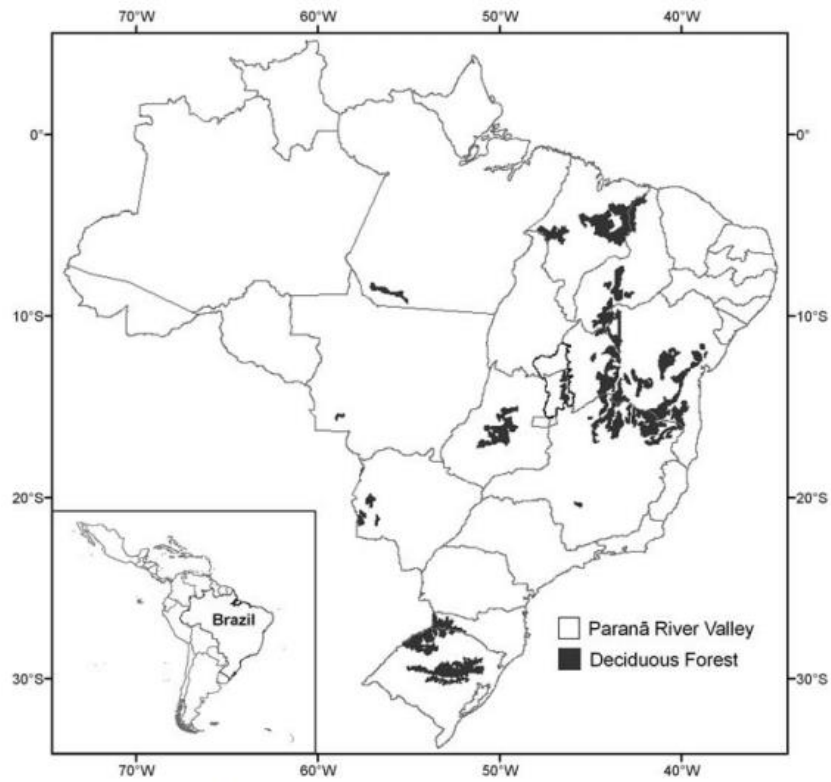

**Fig. 11.1** Map of Brazil showing the distribution of the deciduous forests (shaded areas) and the location of the Paraná River Valley in Central Brazil

Fig. 11.1 in the book edited by Scariot et al.
